# Supplementary material for: Ferroptosis Inducers Up-Regulate PD-L1 in Recurrent Triple Negative Breast Cancer
Source: Preprints.org preprint supplement (doi:10.20944/preprints202311.1658.v1), 2023-11-27
Supplement: Supplementary file 2 [file supplementary]

Type of the Paper (Article)

Ferroptosis inducers up-regulate PD-L1 in recurrent triple negative breast cancer

Christophe Desterke 1,*, Yao Xiang 2, Rima Elhage 2,3, Clémence Duruel 2,3, Yunhua Chang 2, * and Ahmed Hamaï 2,3,*

1 UFR Médecine-INSERM UMRS1310, Université Paris-Saclay, F-94800 Villejuif, France

2 INSERM UMR-S1151, CNRS UMR-S8253, Institut Necker Enfants Malades, Université Paris Cité, F-75015 Paris, France; xiangyao.ecole@outlook.com (Y.X.); rima.elhage@inserm.fr (R.E.); clemence.duruel@inserm.fr (C.Du.)

3 Team 5/Ferostem Group, F-75015 Paris, France

***** Correspondence: christophe.desterke@inserm.fr (C.D.); yunhua.chang-marchand@inserm.fr (Y.C.); ahmed.hamai@inserm.fr (A.H.)

**SUPPLEMENTAL FIGURES**

**Figure S1. Breast tumor expression of markers included in CD274-ferrptosis score (TCGA cohort):** A/ CD274 expression stratified on pam50 molecular classification (dot colors represent node stages and dot size is relative to the age of diagnosis); B/ IFNG expression stratified on pam50 molecular classification (dot colors represent node stages and dot size is relative to the age of diagnosis); C/ IDO1 expression stratified on pam50 molecular classification (dot colors represent node stages and dot size is relative to the age of diagnosis); D/ TNFAIP3 expression stratified on pam50 molecular classification (dot colors represent node stages and dot size is relative to the age of diagnosis).

**Figure S2. OncotypeDx quantification in breast tumor sample and Schoenfeld test for multivariable survival model (TCGA cohort):** A/ Scatterplot of oncoDx score versus CD274-ferroptosis driver score stratified on pam50 molecular classification (Student ttest on OncoDx score was done between CD274-ferroptosis groups low and high); B/ Schoenfeld test done on covariates included in overall survival multivariable model of the TCGA cohort.

**Figure S3. Overexpression of CD274, IDO1, IFNG and TNFAIP3 in TNBC subgroup of METABRIC cohort:** A/ Boxplot of CD274 expression stratified on TNBC subgroup membership; B/ Boxplot of IDO1 expression stratified on TNBC subgroup membership; C/ Boxplot of IFNG expression stratified on TNBC subgroup membership; D/ Boxplot of TNFAIP3 expression stratified on TNBC subgroup membership


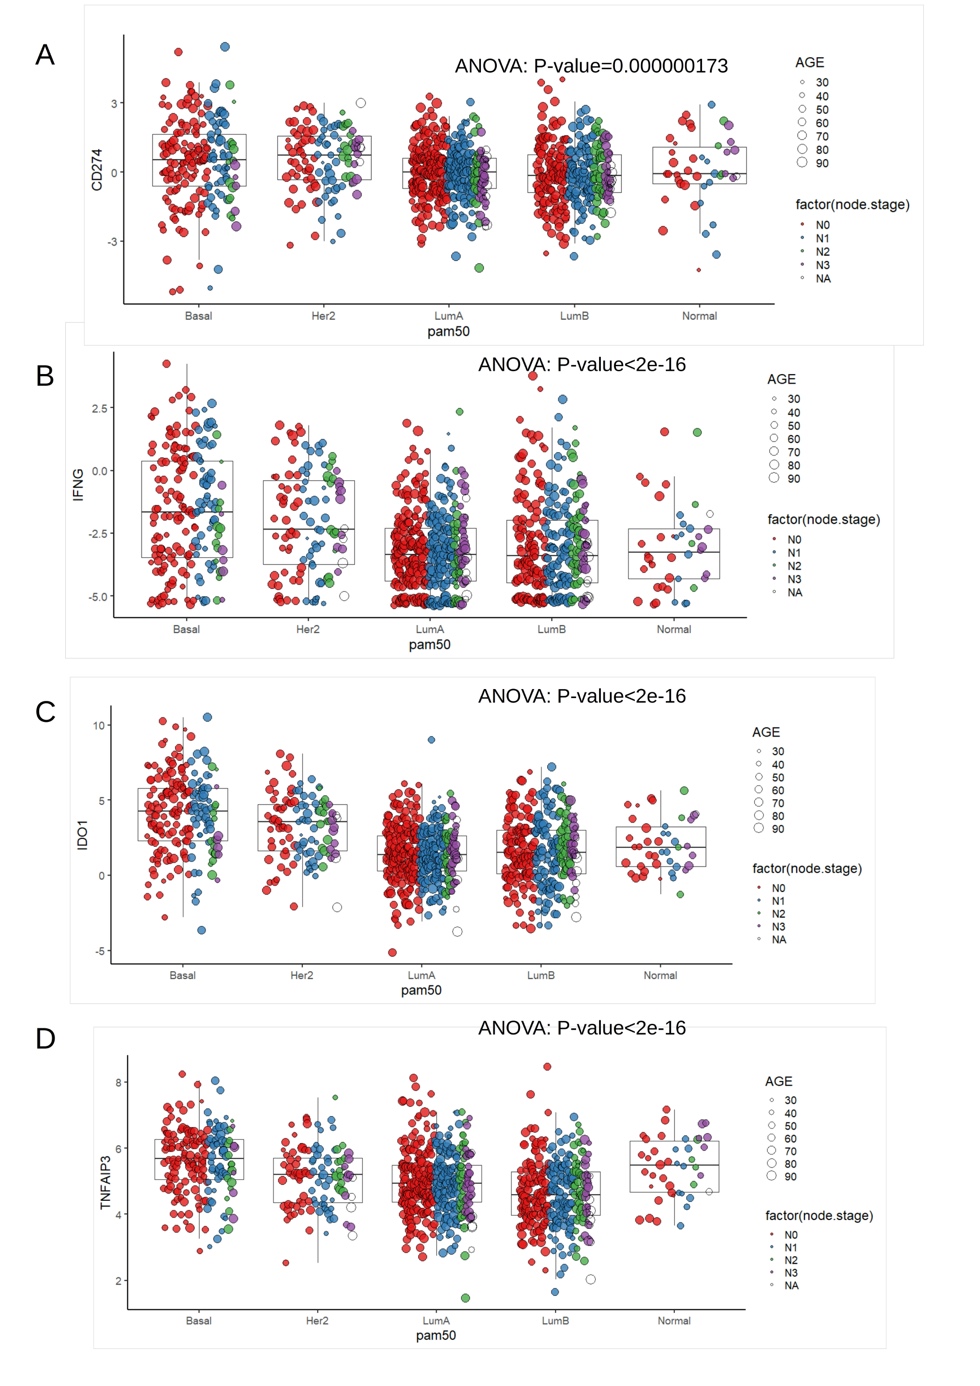


**Figure S1.**


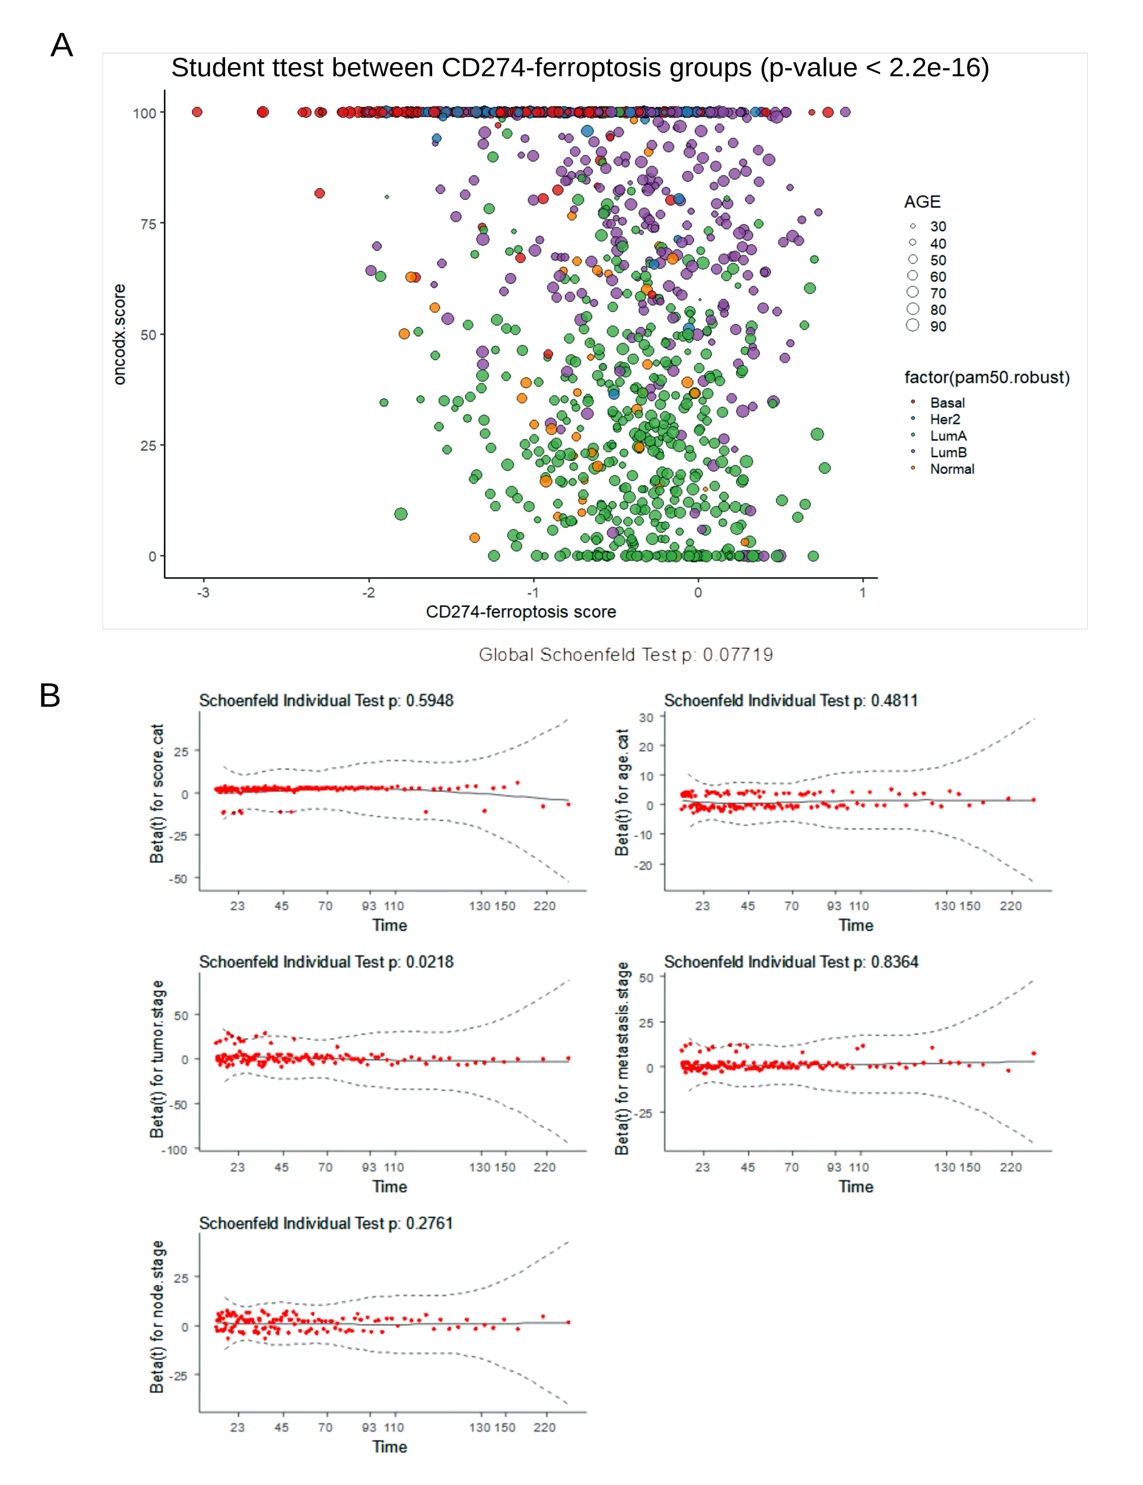


**Figure S2**


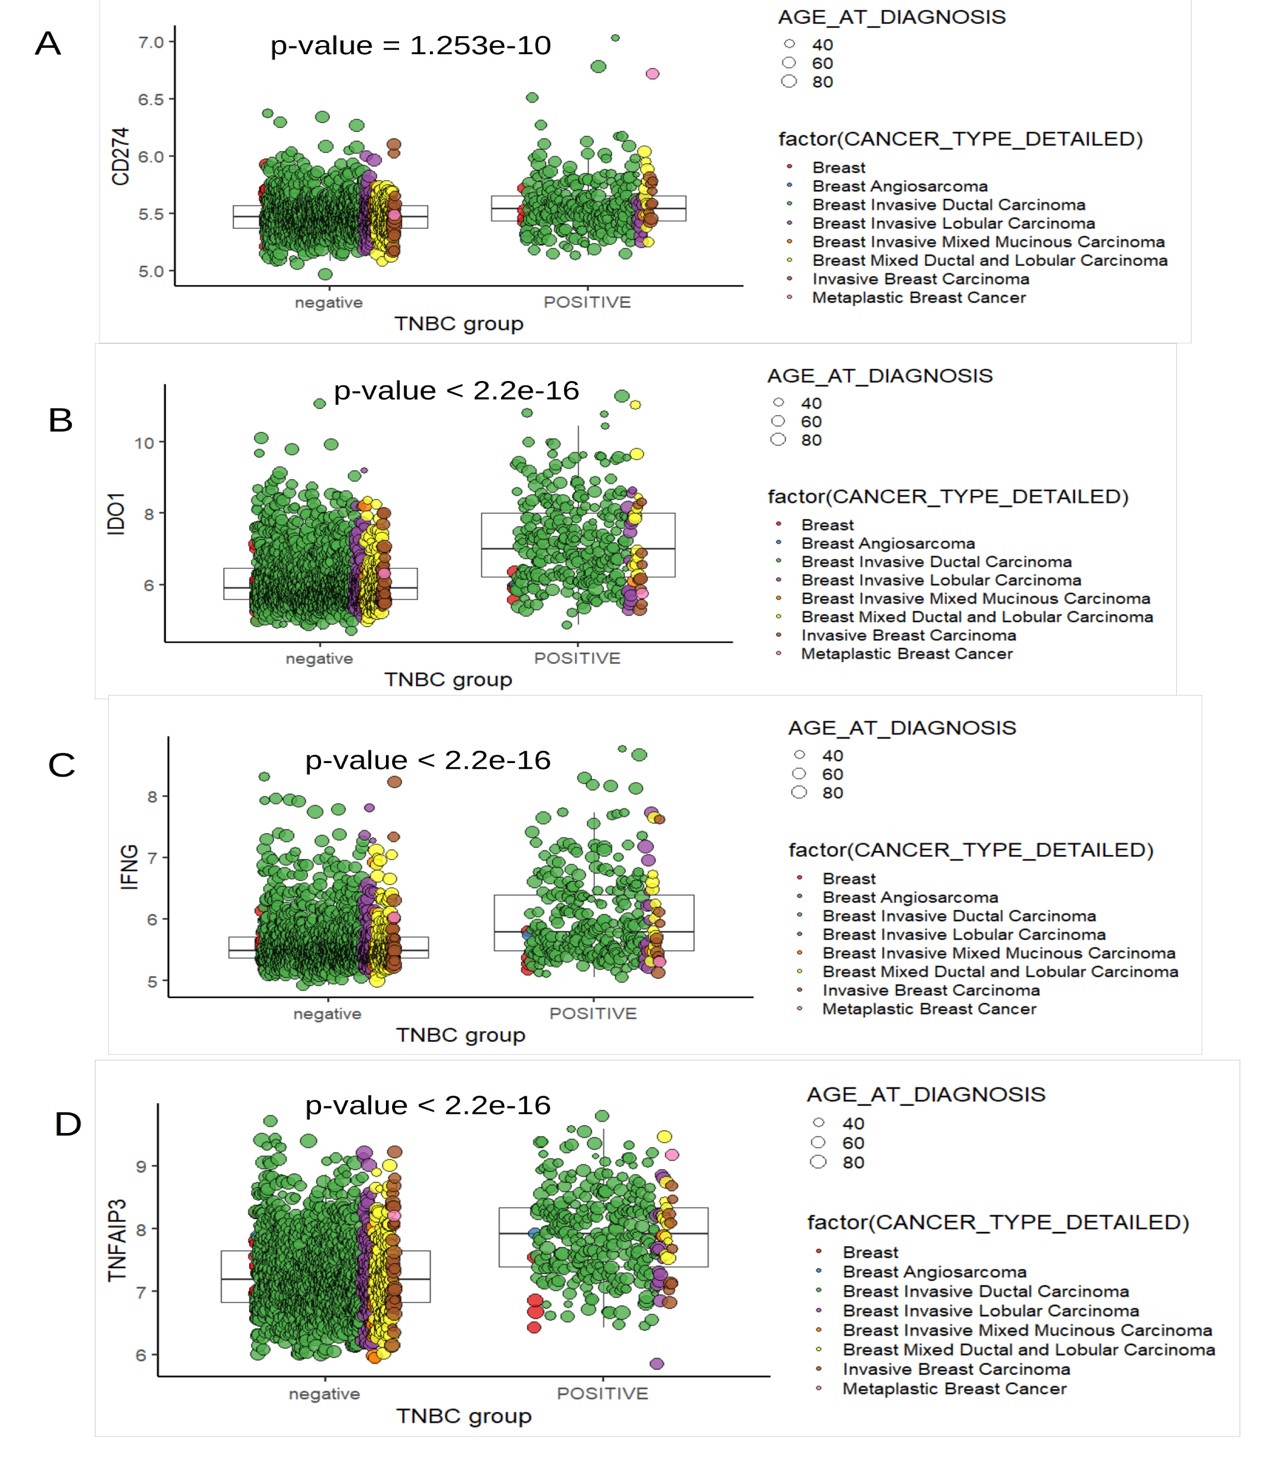


**Figure S3**
